# Supplementary material
Source: Springer Nature journal article supplement (https://www.springermedizin.de/resource/supplementary/12936_2011_1759_MOESM2_ESM.pdf/9541646)
Supplement: MOESM2 [file 9541646]

# Dried Blood Spots

Oral Fluid

|          | Positive | Negative | Total |
|----------|----------|----------|-------|
| Positive | 24       | 0        | 24    |
| Negative | 0        | 29       | 29    |
| Total    | 24       | 29       | 53    |

$$\text{Sensitivity} = 24/24 = 100\%$$

$$\text{Specificity} = 29/29 = 100\%$$
